# Supplementary material for: Passivation by pyridine-induced PbI2 in methylammonium lead iodide perovskites
Source: Royal Society of Chemistry journal article supplement (doi:10.1039/d0ra04641h), 2020-01-01
Supplement: d0ra04641h1.pdf [file d0ra04641h1.pdf]

**Supplementary Information**

**Passivation by Pyridine-Induced  $\text{PbI}_2$  in Methylammonium Lead Iodide Perovskites**

Andre Cook<sup>a,b</sup>, Timothy W. Jones<sup>b</sup>, Jacob Tse-Wei Wang<sup>b</sup>, Hua Li<sup>c</sup>, Rob Atkin<sup>c</sup>, Noel W. Duffy<sup>d</sup>, Scott W. Donne<sup>a</sup> and Gregory J. Wilson<sup>b</sup>

- a. University of Newcastle, Callaghan, NSW 2308, Australia.*
- b. CSIRO Energy Centre, Mayfield West, NSW 2304, Australia.*
- c. School of Molecular Sciences, The University of Western Australia, WA 6009, Australia*
- d. CSIRO Energy Clayton Laboratories, Clayton, Vic 3169, Australia.*

### SI 1: 1M and Pbl<sub>2</sub> PL Emissions

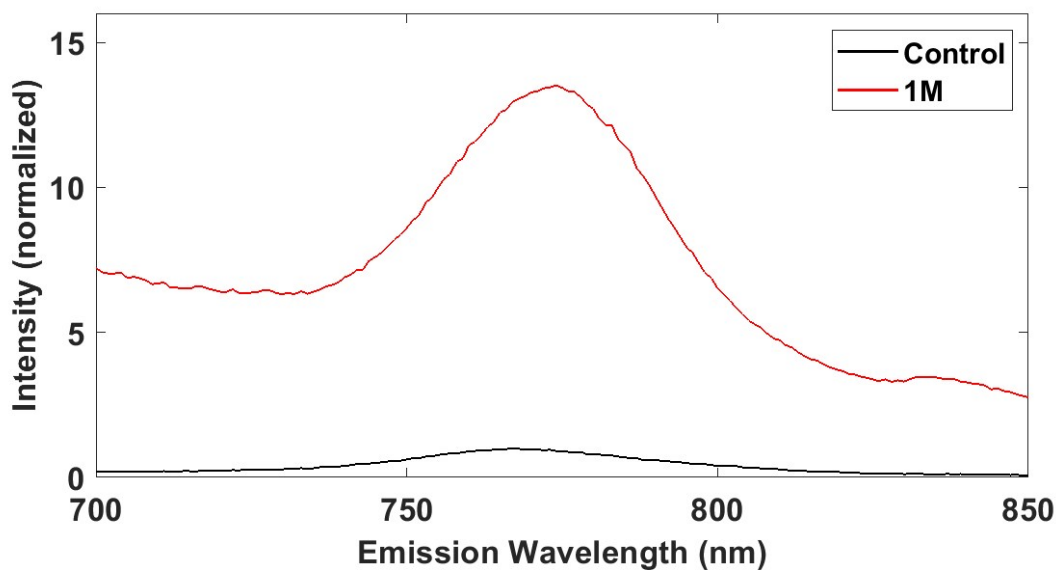

**Fig. S1:** Photoluminescent emission for the control and 1M pyridine treated perovskite films, normalized to the control film. This shows a 14 fold enhancement in peak intensity, however there is also a large emission across the 700-850 nm spectrum, suggesting a broad range of bandgaps exist, possibly due to 2D perovskites. This is backed up by the 10° peak seen in the XRD patterns.

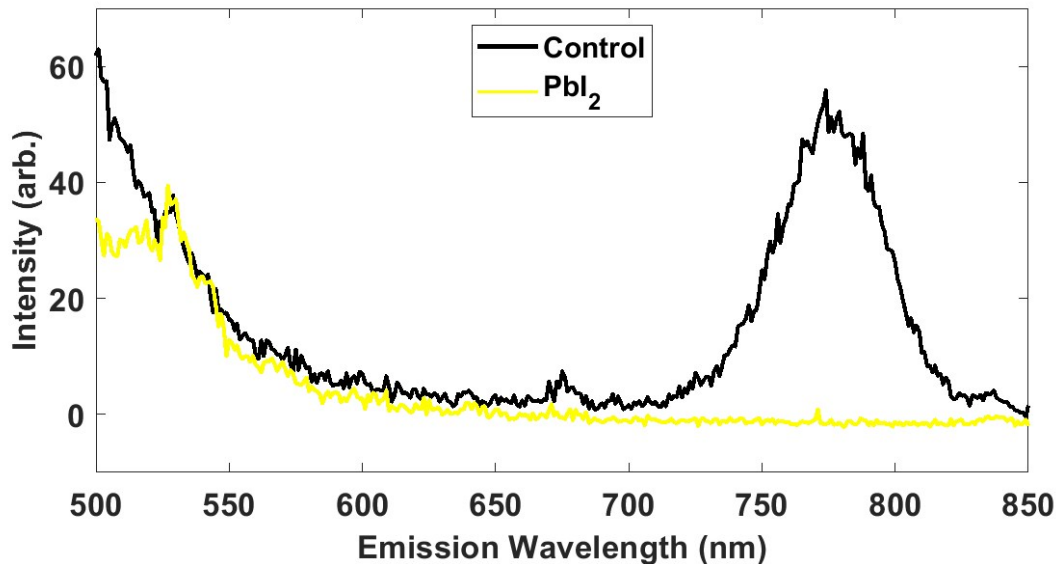

**Fig. S2:** Broad emission range PL for a MAPbI<sub>3</sub> film fabricated with excess Pbl<sub>2</sub> and a Pbl<sub>2</sub> film centred at 470 nm excitation. This shows an emission peak for the Pbl<sub>2</sub> at 530 nm for both films. There is a background emission from the excitation source approaching 500 nm.

## SI 2: AFM Images

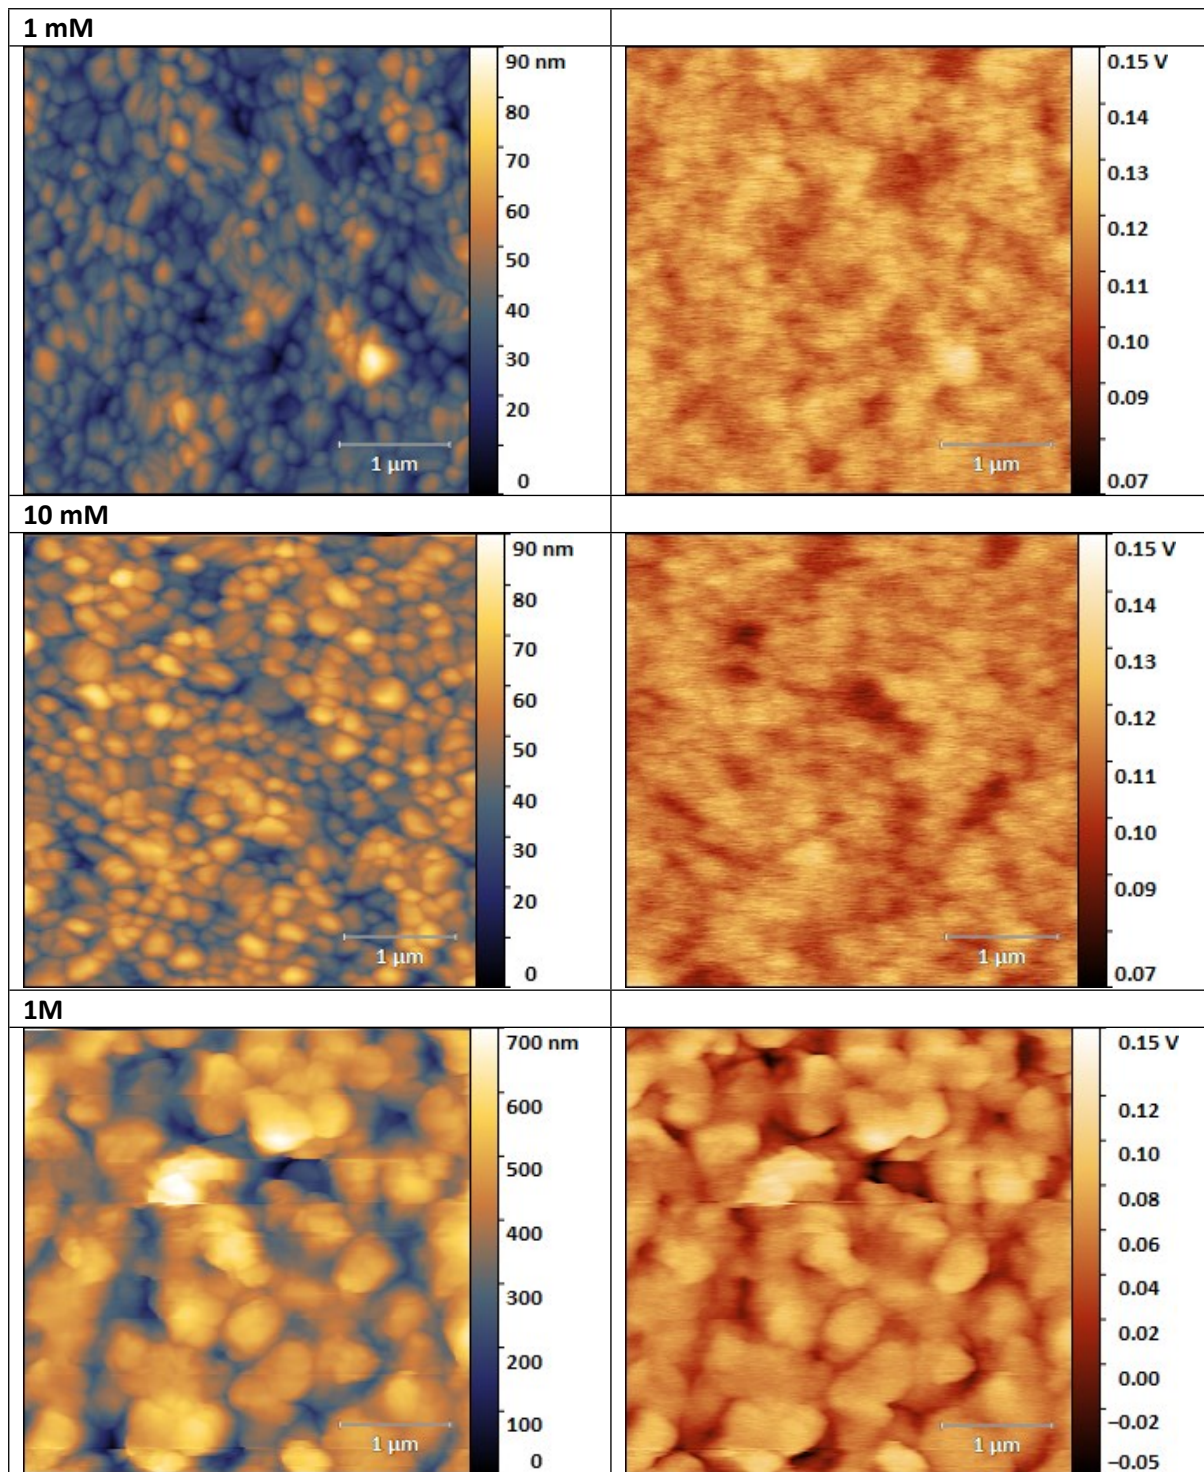

**Fig S3** – AFM images for the remaining pyridine treated MAPbI<sub>3</sub> samples. Note the large change in the scale for the 1M treated morphology image.

SI 3: Split CFM Images

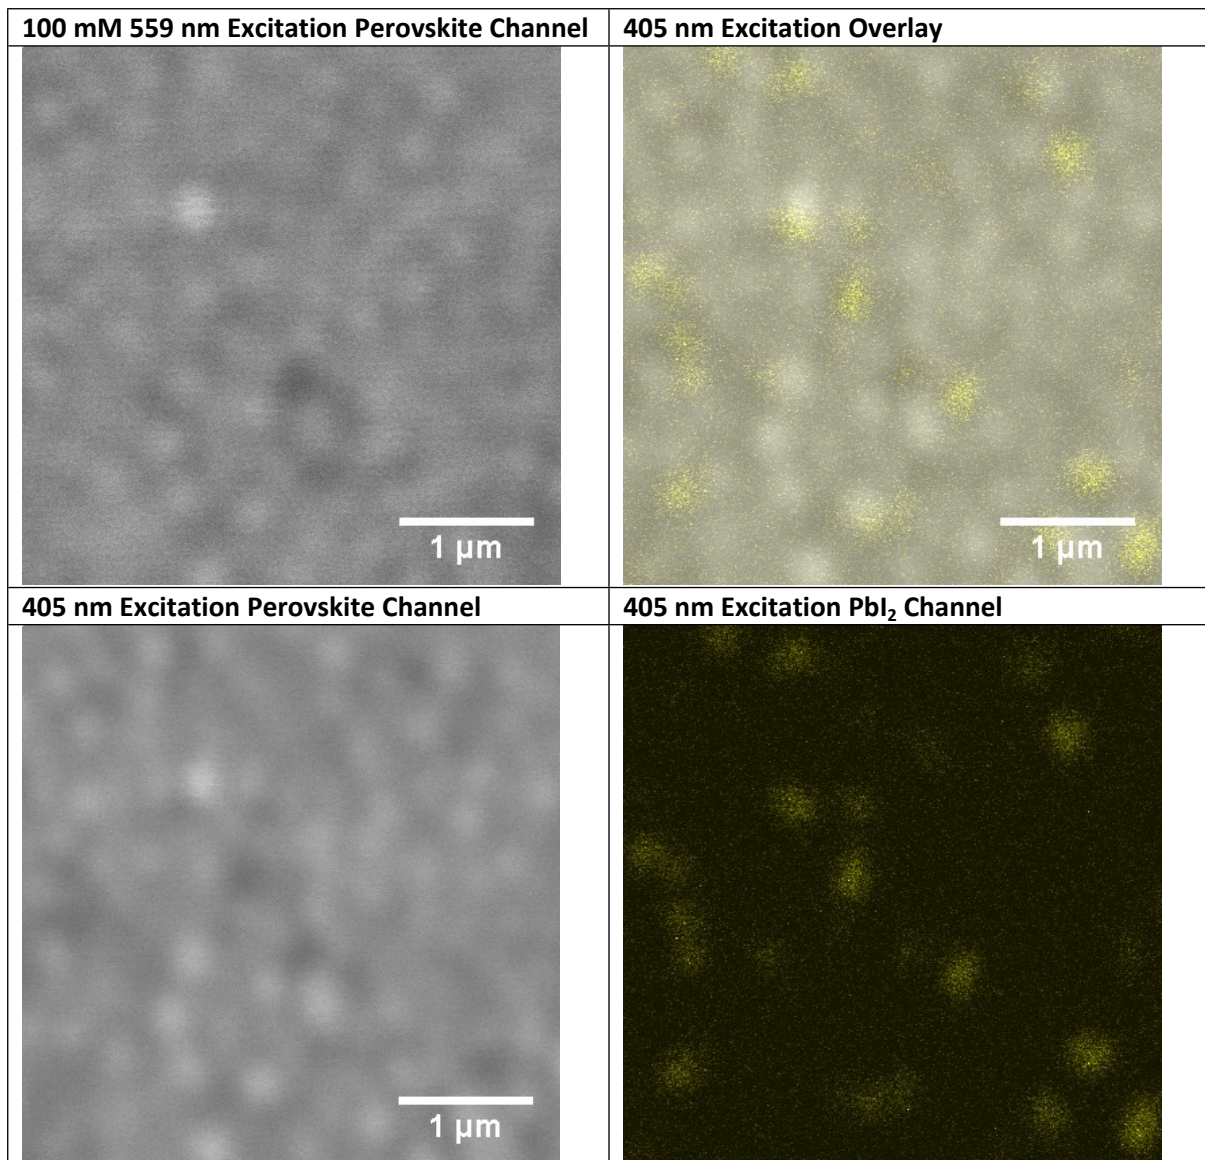

Fig S4 – Separated channel images used to generate the 405 nm excitation overlay for Fig. 4 in the main body.

**SI 4: CFM Images of MAPbI<sub>3</sub> Treated with Increasing Concentration of Pyridine in Chlorobenzene.**

|                                                                                     |                                                                                      |
|-------------------------------------------------------------------------------------|--------------------------------------------------------------------------------------|
| Control 559 nm Ex                                                                   | Control 405 nm Ex                                                                    |
| 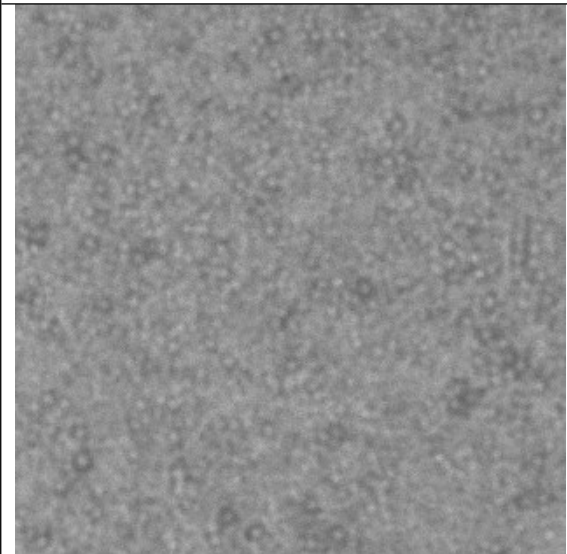   |    |
| 1 mM 559 nm Ex                                                                      | 1 mM 405 nm Ex                                                                       |
|   |   |
| 10 mM 559 nm Ex                                                                     | 10 mM 405 nm Ex                                                                      |
|  |  |

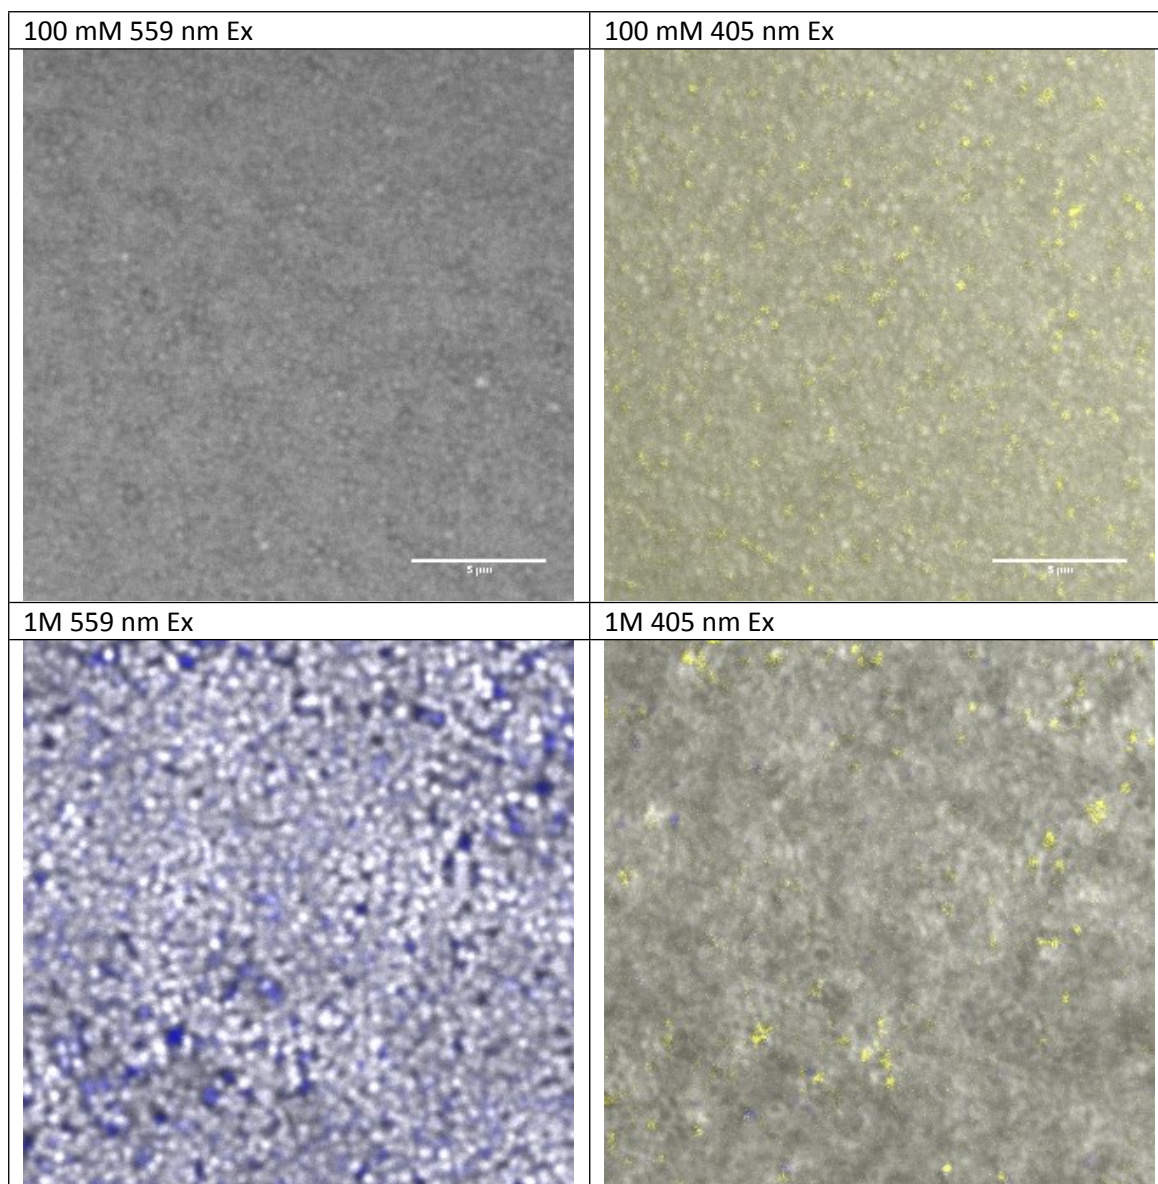

**Fig. S5** – CFM images of all the samples used in the study. Colours, grey is the perovskite signal, yellow for the  $\text{PbI}_2$  signal and blue for transmitted light. Notably a visible change in structure appears at 1M pyridine treatment with the formation of larger grains and holes (blue). All images are 20x20  $\mu\text{m}$ .
